# Supplementary material
Source: PubMed Central journal article supplement (PMC8463676)

# Fig.S1

**A**

Adjacent

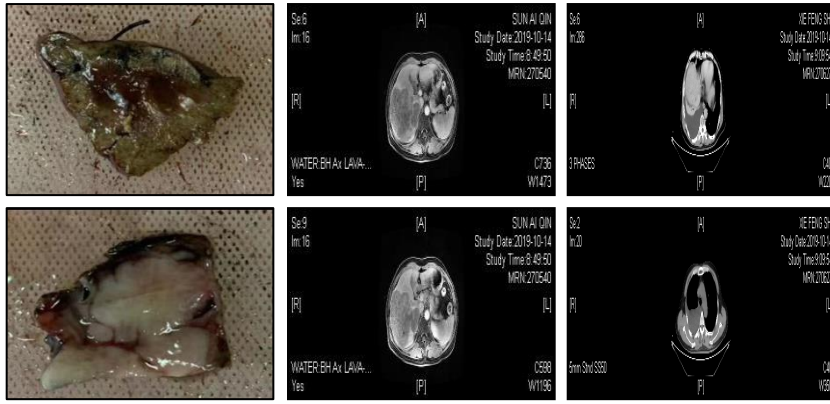

Tumor

**B**

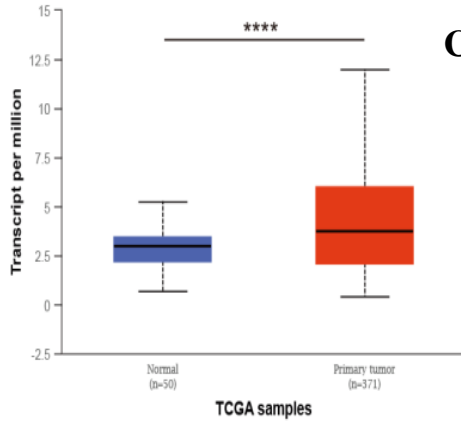

**C**

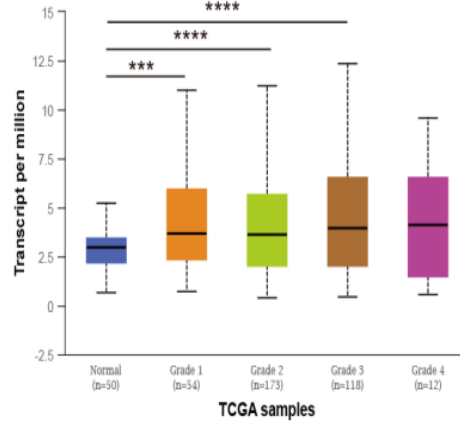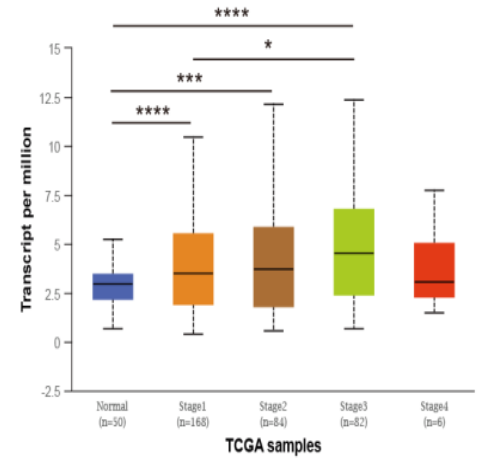

**D**

Strata ■ Low group ■ High group

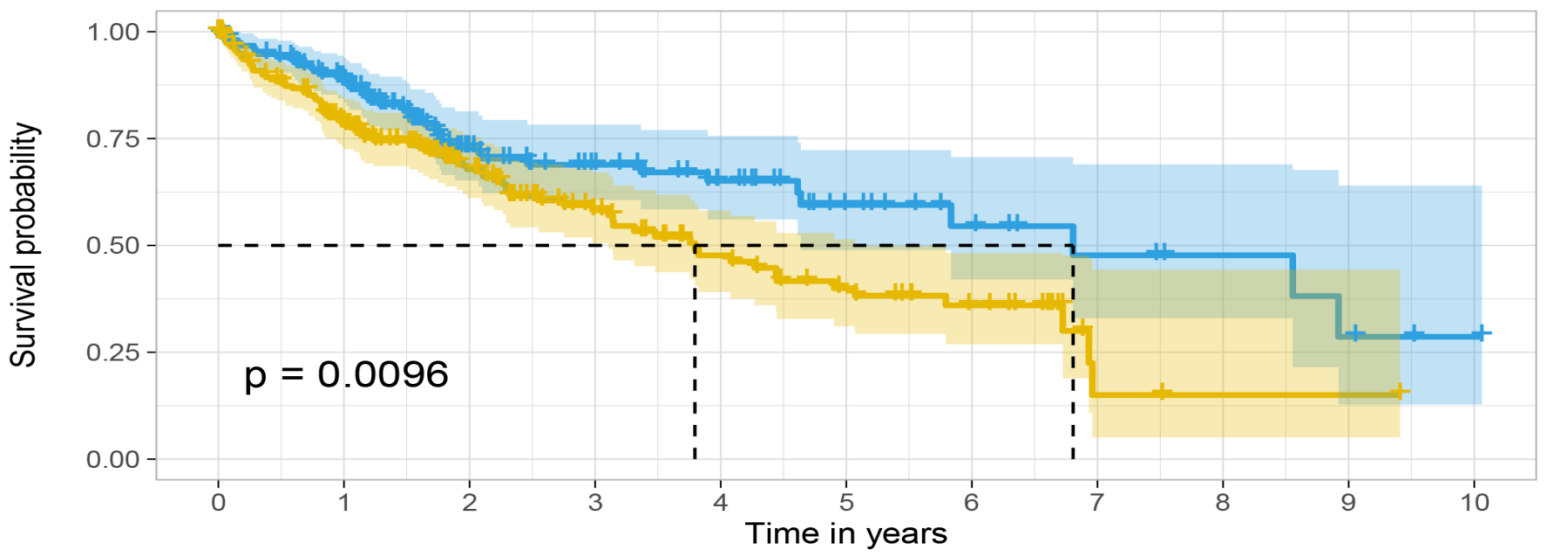

Number at risk

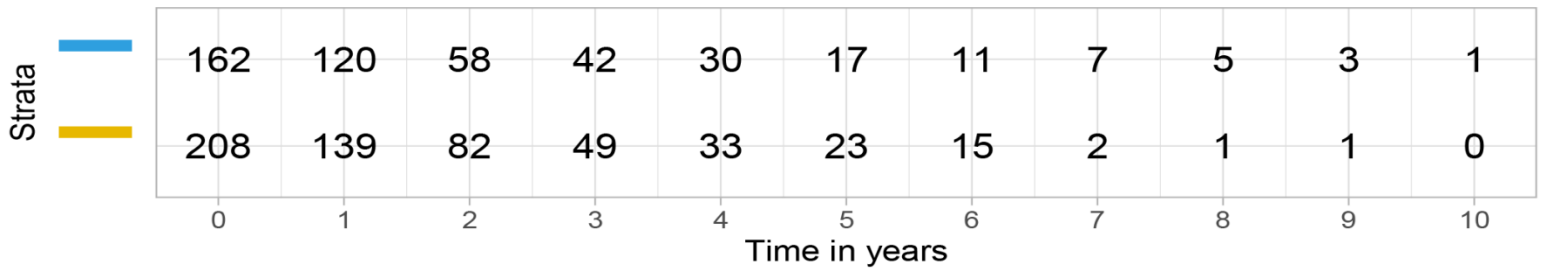

Number of censoring

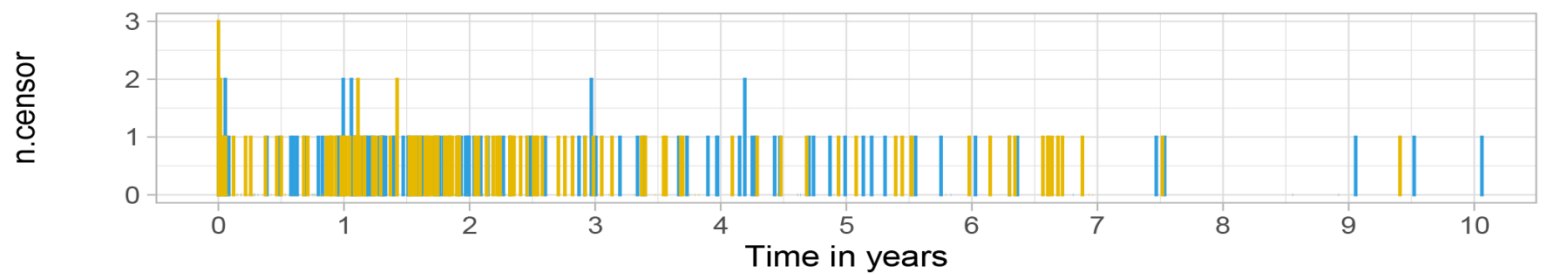

**E**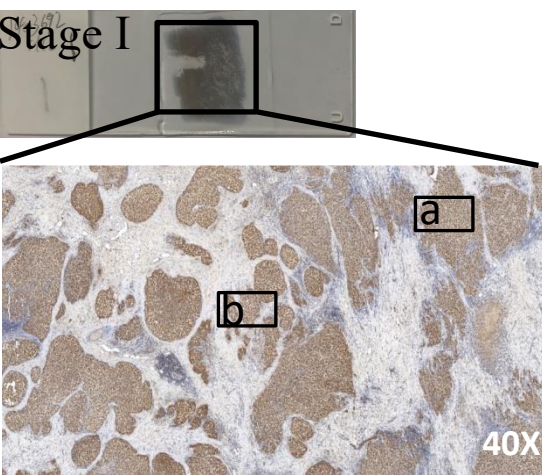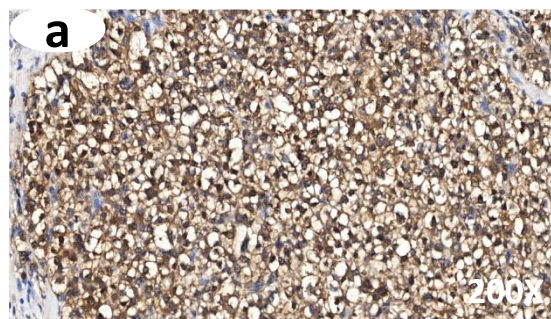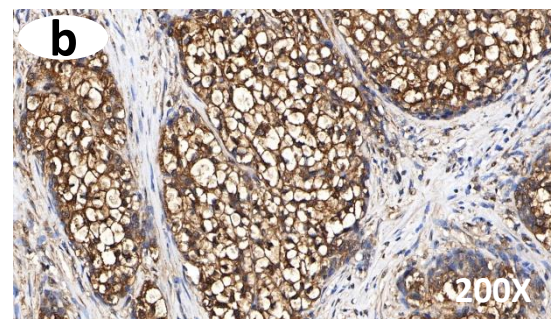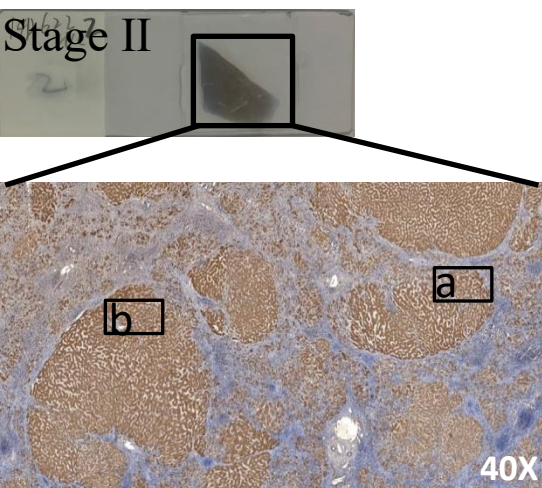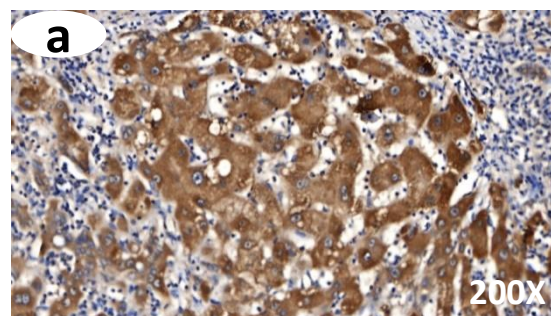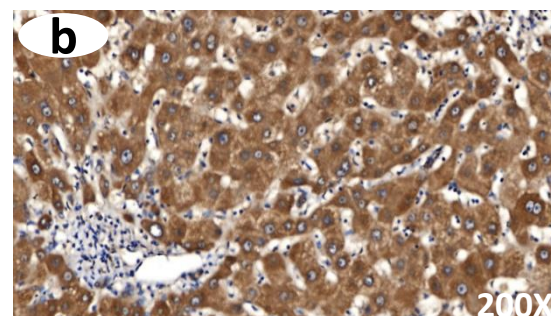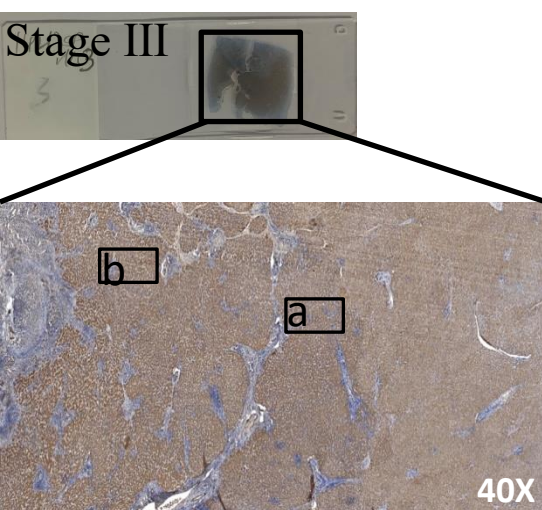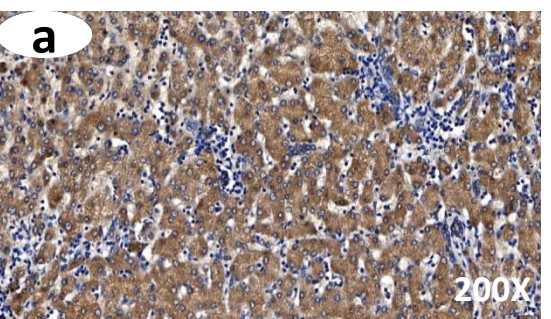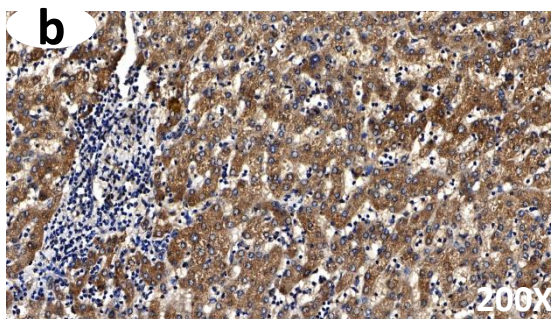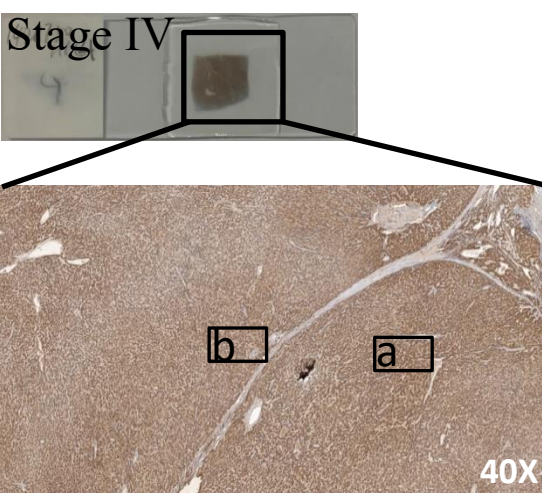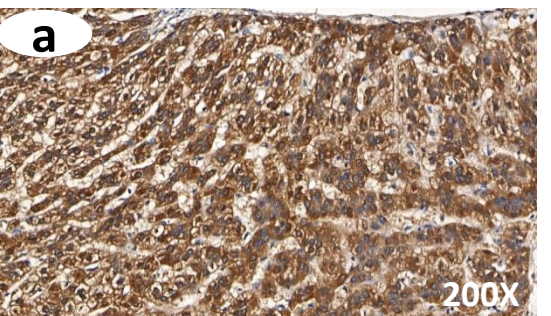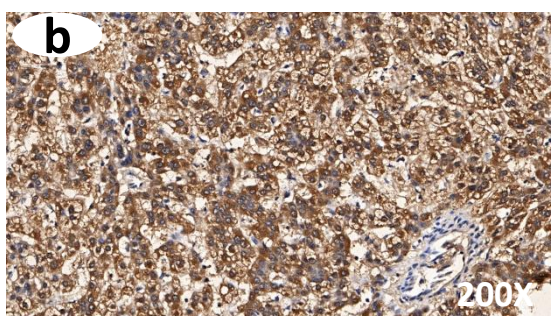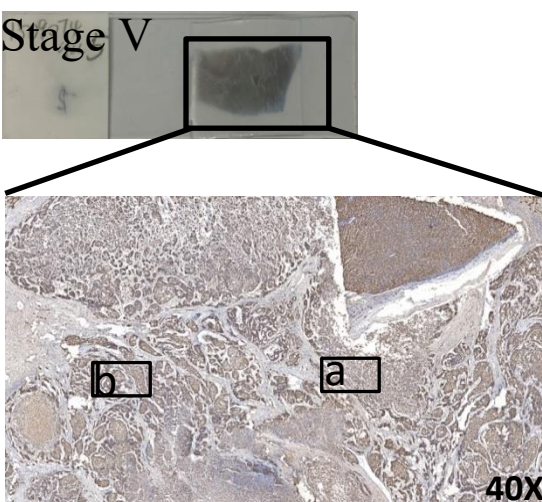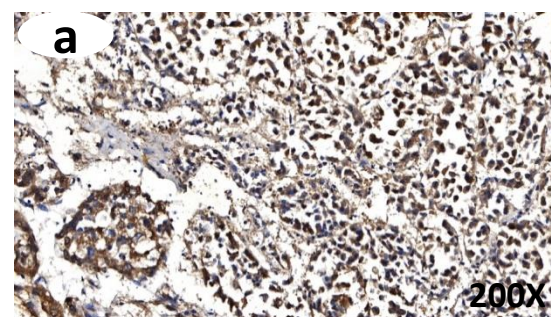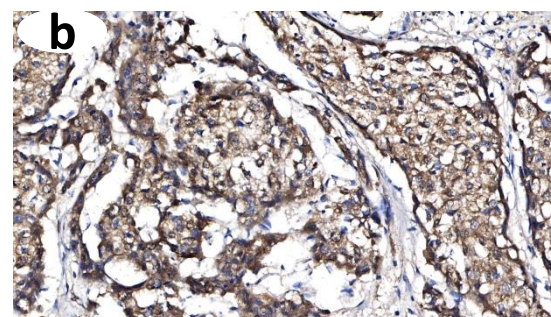

**Fig.S2****A**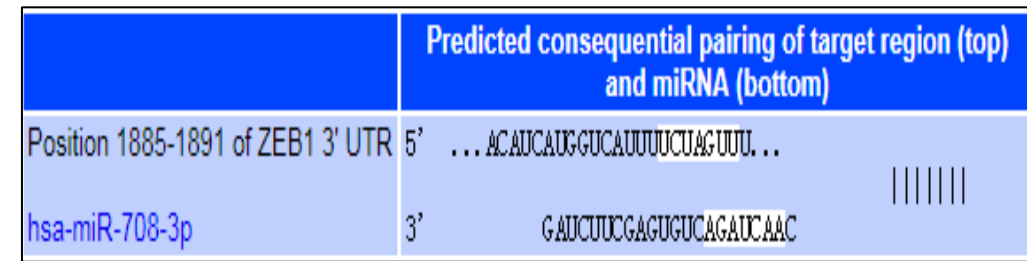**B**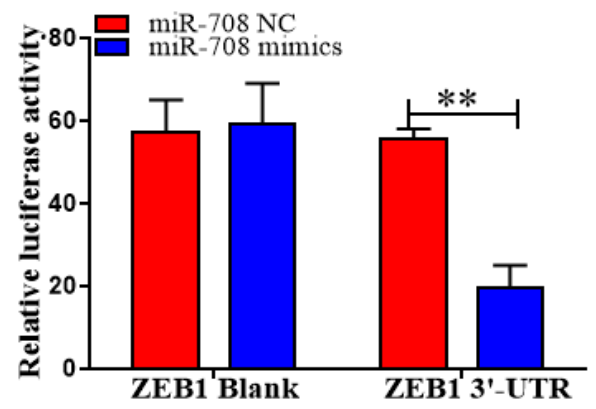**C**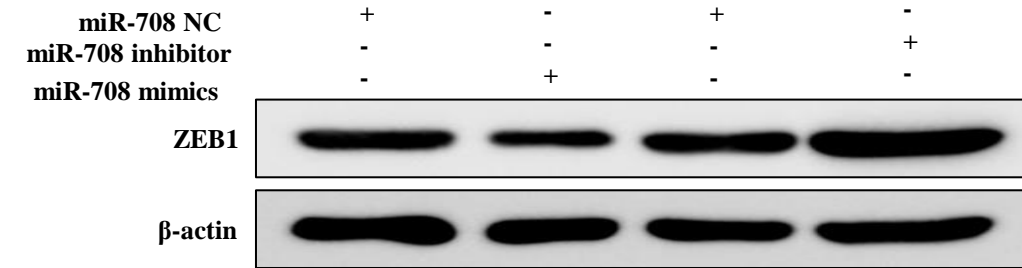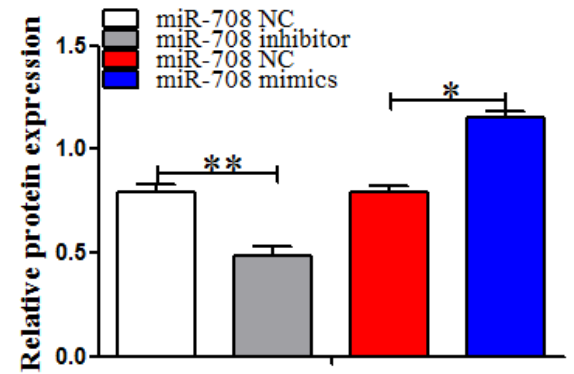**D**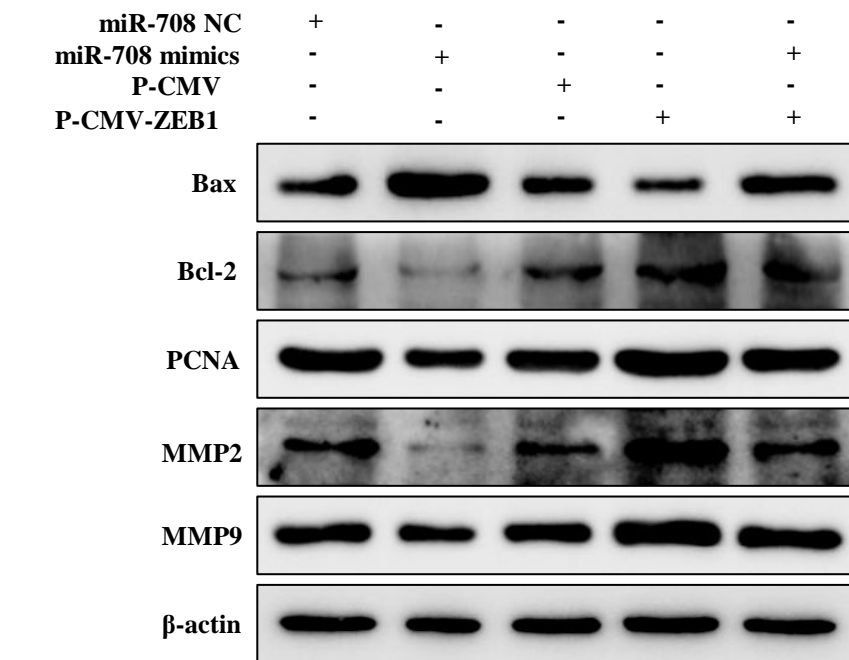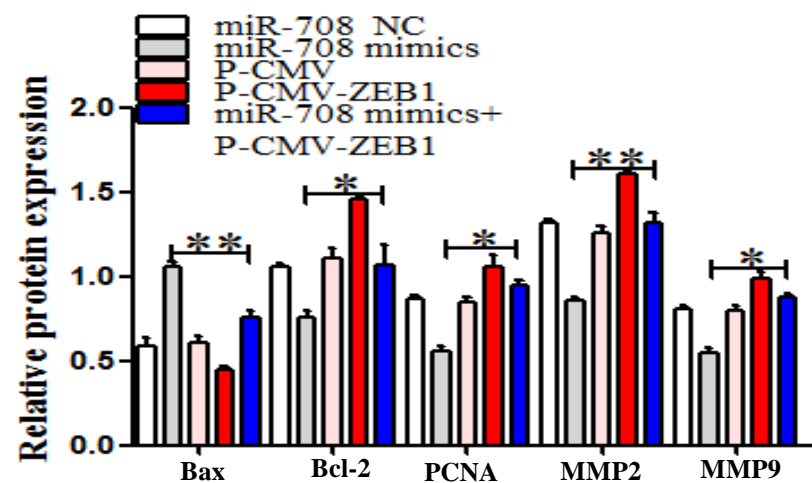**E**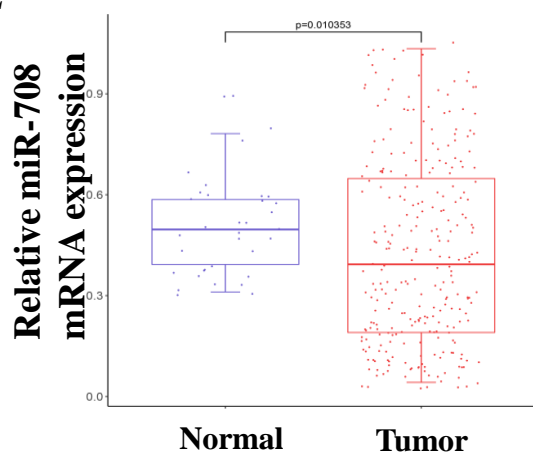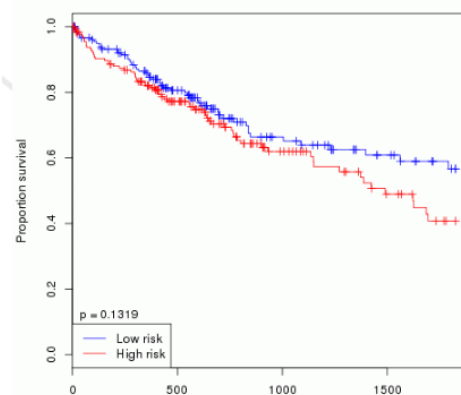**F**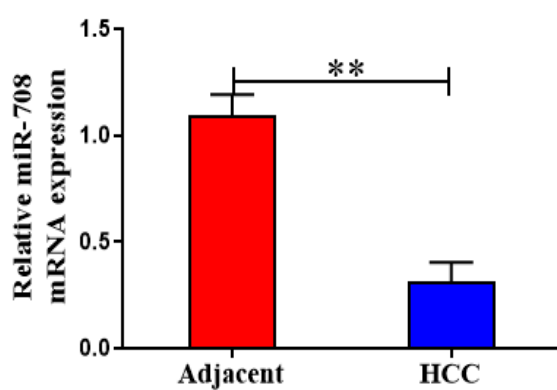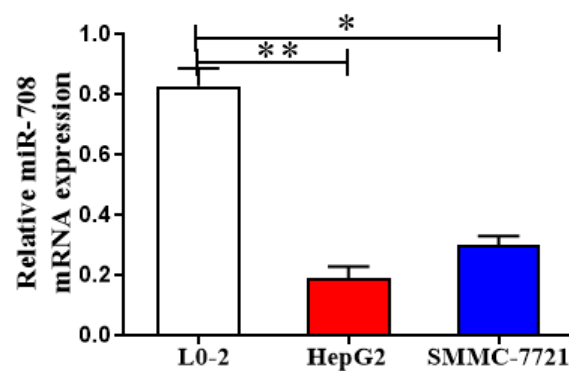

**Fig.S3**

HepG2 cells

A.

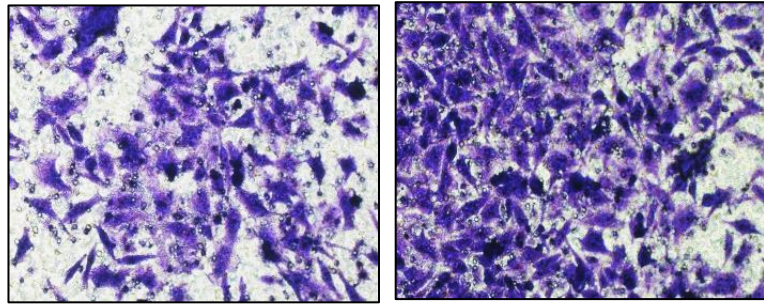

miR-708 NC

miR-708 NC+TGF- $\beta$ 1

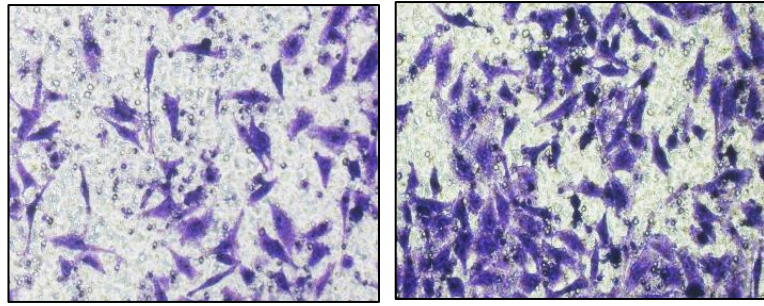

miR-708 mimics

miR-708 mimics +TGF- $\beta$ 1

---

**Invasion**

B.

HepG2 cells

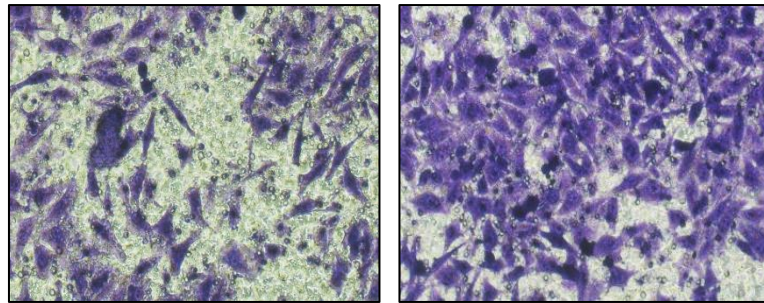

miR-708 NC

miR-708 NC+TGF- $\beta$ 1

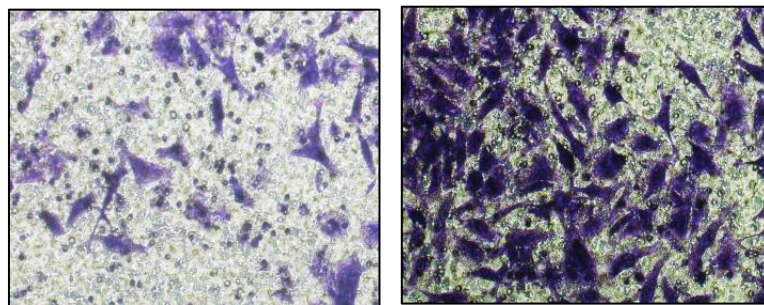

miR-708 mimics

miR-708 mimics +TGF- $\beta$ 1

---

**Migration**

**Fig.S4**

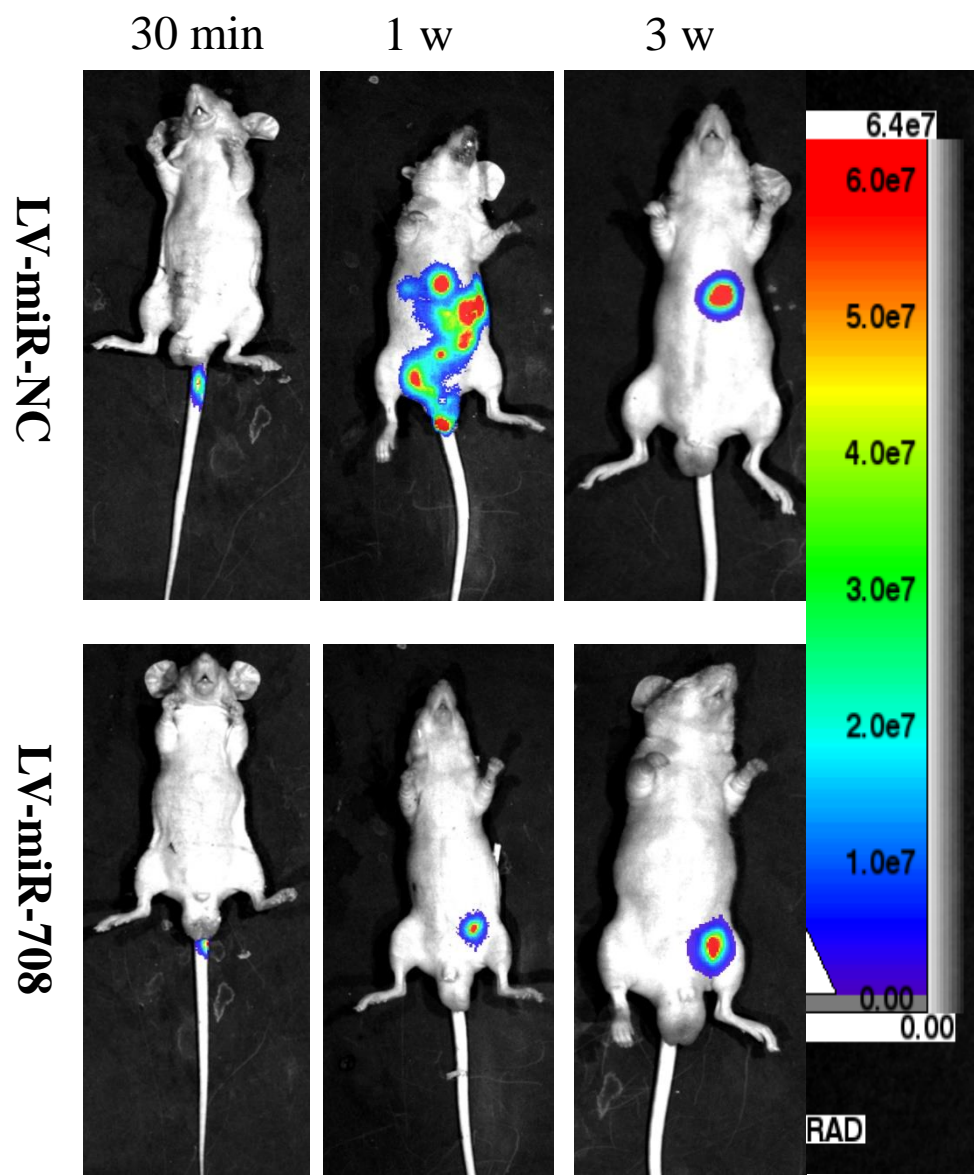

Supplement: 41401_2020_575_MOESM1_ESM.pdf [file 41401_2020_575_MOESM1_ESM.pdf]
